# Supplementary material for: Training the Future MLS Educators Through the Doctorate in Clinical Laboratory Sciences: A Mixed-Methods Study
Source: Research Square preprint supplement (doi:10.21203/rs.3.rs-8532872/v1), 2026-02-24
Supplement: Supplementary file 1 [file 91b85b69ffd8f657e04818ac.docx]

**Appendix C:** Illustrative Quotes Mapped to Open Codes, Axial Codes and Emergent Themes

| **Participant Quote** | **Open Coding** | **Axial Coding** | **Key Theme** |
| --- | --- | --- | --- |
| Oversee research/projects, guide residents, master’s students, fellows… can also do consultations. (P1, p.2, L42) | Leadership in research; mentoring; consultation | DCLS professionals expand their influence across clinical, academic, and advisory roles. | Expanded Scope of Practice |
| …feel more confident going into a classroom, able to deal with physicians, with nurses and other peers, elevate our profession and serve as a role model for our students. (P2, p.1, L21) | Professional confidence; interprofessional collaboration; role modeling | Enhanced self-efficacy enables DCLS educators to engage effectively with peers and learners. | Expanded Scope of Practice |
| Advancement of our profession, bring out the laboratory into the playing field with other healthcare professionals. (P3, p.2, L11) | Advocacy for laboratory professionals; professional visibility | DCLS professionals promote integration of laboratory science in interprofessional care. | Expanded Scope of Practice |
| …because of my training and being a DCLS, I was able to step into a role of facilitator and oversee interprofessional education. (P4, p.2, L68) | Educational leadership; facilitation of teamwork | Training enables DCLS professionals to lead and coordinate interprofessional educational initiatives. | Expanded Scope of Practice |
| …able to teach graduate students but still have a foot in the clinical side and contribute to patients and patient care. (P5, p.1, L24) | Dual engagement in academia and clinical care | The DCLS role bridges academic teaching with applied patient-focused practice. | Expanded Scope of Practice |
| Just improves our method of teaching. I can put it all together, better prepare them and better explain it to my learners. (P2, p.2, L57) | Refinement of teaching approach; application of DCLS learning | DCLS enhances teaching effectiveness and integration of advanced knowledge. | Development as Subject Matter Experts |
| We get well-rounded with all the topics and not only do we cover the basics, but we also go more in-depth in the medical area. (P3, p.1, L26) | Comprehensive subject understanding; depth of content mastery | DCLS training strengthens educators’ expertise across multiple disciplines. | Development as Subject Matter Experts |
| …gives you the broader scope of understanding and takes you out of the lab and helps you understand more through the eyes of the practitioner. (P5, p.1, L30) | Perspective-taking; cross-disciplinary understanding | The DCLS experience fosters clinical insight and interdisciplinary thinking. | Development as Subject Matter Experts |
| …help me further my teaching, having to step out of my normal role of only teaching blood bank and take over some of these other areas. (P6, p.2, L43) | Professional flexibility; confidence; adaptation | DCLS education promotes skill diversification and adaptability in teaching. | Development as Subject Matter Experts |
| …didactics helped me reinforce my own learning, help bring a little bit of perspective to patient care so when I talk with students, I can really tell them stories about laboratory impacting clinical care. (P8, p.4, L125) | Linking academic content with clinical application; reflection | Incorporating real-world examples deepens student engagement and clinical understanding. | Development as Subject Matter Experts |
| It’s trial by fire, you’re dealing with patients, and you are visible… it opened the education piece, it was an opportunity to help bridge the gap. (P1, p.6, L213) | Real-world patient interaction; communication challenges; professional growth | Clinical experiences build confidence and enhance communication with healthcare teams. | Experiences During Clinicals/Residency |
| Wish we could have done more DMTs, learning how to talk to residents, clinicians, and fellows… it’s a big adjustment to not feel intimidated. (P2, p.4, L147) | Building confidence; interprofessional communication; resilience | Clinical training fosters interpersonal confidence and professional character. | Experiences During Clinicals/Residency |
| It was a good experience because we got to see how clinicians do things… The process helped build confidence. (P3, p.3, L101) | Observation and participation in multidisciplinary care | Exposure to clinician perspectives enhances professional confidence. | Experiences During Clinicals/Residency |
| Clinicals… gave me insight that I don’t think I could have gotten in any other way… interacting with patients. (P5, p.2, L61) | Immersive learning; patient-centered perspective; interdisciplinary exposure | Clinical experiences enrich understanding of healthcare collaboration. | Experiences During Clinicals/Residency |
| ...listen and educate, listen to understand, don’t react right away, they don’t know what we do so approach with kindness and teach them. (P2, p.4, L128) | Active listening; empathy; patience in communication | Emotional intelligence facilitates effective collaboration and education. | Learning Through Emotional Intelligence |
| Elevate our profession but do not diminish theirs. (P3, p.3, L95) | Mutual respect; professional humility | Balancing advocacy with respect promotes healthy interprofessional relationships. | Learning Through Emotional Intelligence |
| …knowing what value DCLS can bring to IPE teams, being confident, being humble to know our roles and responsibilities… asking questions to learn just as much as you are there to teach. (P8, p.6, L189) | Confidence with humility; reciprocal learning | Emotional awareness fosters mutual respect and shared learning. | Learning Through Emotional Intelligence |
| I am going through the process because I want to become better, for myself… it’s good for them to see an individual going for higher education. (P2, p.6, L199) | Self-improvement; role modeling; representation | Pursuing the DCLS degree inspires students and strengthens academic identity. | Value Added to Individuals |
| There is a benefit for educators to go this way; it gives them an understanding to guide their own studies. (P5, p.2, L77) | Reflective practice; educator development | Doctoral education deepens pedagogical insight and reflective capacity. | Value Added to Individuals |
| There is a value with the doctorate degree, you must find it as an individual, you must want it. (P6, p.5, L184) | Intrinsic motivation; self-determination | Personal drive underpins the meaning and impact of doctoral pursuit. | Value Added to Individuals |
| I learned a lot… there will be a lot more opportunities for DCLS in the future. (P8, p.4, L355) | Optimism; professional growth | Recognition of long-term career and professional advancement through DCLS. | Value Added to Individuals |
