# Supplementary material for: Training the Future MLS Educators Through the Doctorate in Clinical Laboratory Sciences: A Mixed-Methods Study
Source: Research Square preprint supplement (doi:10.21203/rs.3.rs-8532872/v1), 2026-02-24
Supplement: Supplementary file 2 [file a3cf9c2de9a22b01e8ba0349.docx]

**Appendix B. Follow-up Interview Instrument**

### ****Interview Administration****

- **Mode:** Virtual (Zoom)
- **Duration:** Approximately 30–45 minutes
- **Recording:** Audio and video recorded with participant consent
- **Consent:** Obtained electronically before participation
- **Environment:** Conducted in a private setting chosen by the participant

### ****Interview Questions by Theme****

#### **Theme 1: Meaning and Motivation**

1. What does a Doctorate in Clinical Laboratory Science (DCLS) degree mean to you?
2. What was your goal in pursuing the DCLS degree?

#### **Theme 2: Preparation for Educational Roles**

1. How do you think the DCLS program prepared you to be an educator delivering MLS education?
2. What has been the most helpful learning experience you gained from earning your DCLS, and how does that experience influence your work as an MLS educator?
3. What do you see as the role of a DCLS educator in interprofessional healthcare education?
4. How do you, as a DCLS, promote interprofessional education based on your experiences?
5. From your perspective, what are examples of ineffective or improper ways to conduct interprofessional education?

#### **Theme 3: Reflection and Closing**

1. Is there anything else you would like to add about the DCLS degree and its relationship to MLS education?
