# Supplementary material for: Training the Future MLS Educators Through the Doctorate in Clinical Laboratory Sciences: A Mixed-Methods Study
Source: Research Square preprint supplement (doi:10.21203/rs.3.rs-8532872/v1), 2026-02-24
Supplement: Supplementary file 3 [file a52e7fb8ab12b18ad9529fcb.docx]

**Appendix A. Survey Instrument**

**Platform:** QuestionPro (hosted online)
**Estimated completion time:** < 5 minutes
**Response format:** Multiple choice and numeric entry; one optional open-text field for email contact.
**Skip logic:** Enabled for follow-up interview question.

**Section 1: Demographics**

1. **Gender:**
   □ Male
   □ Female
2. **Ethnicity:**
   □ American Indian or Alaska Native
   □ Asian
   □ Black or African American
   □ Hispanic or Latino
   □ Native Hawaiian or Pacific Islander
   □ White
   □ Two or more races
   □ Prefer not to say
3. **Current Occupation:**
   □ Academic Faculty
   □ Laboratory Director
   □ Consultant
   □ Research Scientist
   □ Clinical Instructor
   □ Other (please specify): _________

**Section 2: Educational Background**

1. **What degrees do you currently hold?** (Select all that apply)
   □ Bachelor’s
   □ Master’s
   □ DCLS
   □ PhD
   □ Other (please specify): _________

**Section 3: Professional Experience**

1. **How many years of total work experience do you have in each of the following areas?**
   - Clinical: ___ years
   - Research: ___ years
   - Academia: ___ years

**Section 4: Interprofessional Education**

1. **Are you currently involved in interprofessional education?**
   □ Yes
   □ No

**Section 5: Follow-up Interview Invitation**

1. **Would you be interested in participating in a follow-up virtual interview to discuss in-depth topics related to skills utilized by practicing DCLS educators, teaching styles, and educational techniques?**
   □ Yes
   □ No

*If yes:*
**Please enter your email address:** _____________________

**Scoring and Data Handling Notes**

- No composite scores were calculated; all data were analyzed descriptively.
- Required-response settings minimized missing data.
- Email address field was optional and used solely for follow-up interview coordination.
- All survey data were de-identified prior to analysis and stored on a secure, access-restricted device.
